# Supplementary material for: Complement factor 5 blockade reduces porcine myocardial infarction size and improves immediate cardiac function
Source: PubMed Central journal article supplement (PMC5336537; doi:10.1007/s00395-017-0610-9), 2017-03-03
Supplement: 395_2017_610_MOESM1_ESM.pdf [file 395_2017_610_MOESM1_ESM.pdf]

# Online Resource 1

## Complement factor 5 blockade reduces porcine myocardial infarction size and improves immediate cardiac function

### *Basic Research in Cardiology*

Pischke SE, Gustavsen A, Orrem HL, Egge KH, Courivaud F, Fontenelle H, Despont, A, Bongoni AK, Rieben R, Tønnessen TI, Nunn MA, Scott H, Skulstad H, Barratt-Due A, Mollnes TE.

Department of Immunology, Intervention Centre, Department of Anaesthesiology, Division of Emergencies and Critical Care, Oslo University Hospital, Oslo, Norway

s.e.pischke@medisin.uio.no

### Supplemental table 1: detailed information about pigs (*Sus scrofa*) used in accord with ARRIVE guidelines [1]

| Item                   | Explanation                                                                                                                                                                                                                    |
|------------------------|--------------------------------------------------------------------------------------------------------------------------------------------------------------------------------------------------------------------------------|
| Species and strain     | <i>Sus scrofa</i> , NOROC                                                                                                                                                                                                      |
| Weight                 | 19.8 ± 0.7 kg                                                                                                                                                                                                                  |
| Age                    | 2 to 3 month old                                                                                                                                                                                                               |
| Sex                    | 11 males : 10 females                                                                                                                                                                                                          |
| Origin                 | Open-air farm (Fredrikstad, Norway)                                                                                                                                                                                            |
| Health status          | No signs of infections (no diarrhoea, no infected scratching marks)                                                                                                                                                            |
| Housing                | Pig boxes (2.4 sq.m) with raised floors in a 40 sq.m room                                                                                                                                                                      |
| Bedding                | Aspen bedding (B&K Universal Ltd, Hull, UK)                                                                                                                                                                                    |
| Housing atmosphere     | Tightly regulated room temperature (20°C) and humidity (55.7%), as well as 12 hours light/dark cycles.                                                                                                                         |
| Feeding                | Unlimited access to commercial pig feed and tap water                                                                                                                                                                          |
| Acclimatization period | One day and night                                                                                                                                                                                                              |
| Transport to OR        | Sedated by intramuscular injection of ketamine (800 mg), azaperone (80 mg), and atropine (1 mg) in the cage. An intravenous catheter was established in an ear vein and sedation deepened using pentobarbital (0.5 – 1 mg/kg). |

|                        |                                                                                                                                                                                                                                                                                                                                                                                                                                                                                                                                                                                                  |
|------------------------|--------------------------------------------------------------------------------------------------------------------------------------------------------------------------------------------------------------------------------------------------------------------------------------------------------------------------------------------------------------------------------------------------------------------------------------------------------------------------------------------------------------------------------------------------------------------------------------------------|
| OR atmosphere          | Sterile and stable environment with regulated temperature (22°C) and humidity (50-60 %).                                                                                                                                                                                                                                                                                                                                                                                                                                                                                                         |
| Temperature            | Controlled with heating blankets to 38°C arterial temperature.                                                                                                                                                                                                                                                                                                                                                                                                                                                                                                                                   |
| Anaesthesia            | Balanced anaesthesia with Isoflurane 1.0-1.5% end tidal concentration and morphine 1-2 mg kg <sup>-1</sup> h <sup>-1</sup> infusion. Anaesthesia depth was regularly evaluated by no reaction to sharp hoof and nose pinching.                                                                                                                                                                                                                                                                                                                                                                   |
| Respiration            | Standard respirator (Leon, Heinen Lowenstein, Bad Ems, Germany). Tidal volume and respiratory rate adjusted to keep arterial pH at 7.36-7.44, arterial oxygen saturation > 94% and arterial oxygen tension > 10 kPa.                                                                                                                                                                                                                                                                                                                                                                             |
| Hemodynamic monitoring | Central venous access via the external jugular vein. Artery catheters placed in the carotid artery for blood sampling and in the femoral artery for thermal dilution cardiac output measurements (PiCCO, Pulsion AG, Munich, Germany). Normovolemia was achieved by bolus infusion of 1000 ml Ringer acetate during the first two hours of the experiment to compensate for food deprivation and loss of sympathetic tone due to the induction of anaesthesia. Thereafter a background infusion of Ringer acetate (12 ml kg <sup>-1</sup> h <sup>-1</sup> ) was given throughout the experiment. |
| Euthanasia             | Bolus of Pentobarbital (300 mg), Morphine (10 mg) and Potassium chloride (50 mmol)                                                                                                                                                                                                                                                                                                                                                                                                                                                                                                               |

---

OR: operation room, iv: intravenous

## References

1. Kilkenny C, Browne WJ, Cuthill IC, Emerson M, Altman DG (2010) Improving bioscience research reporting: the ARRIVE guidelines for reporting animal research. *PLoS Biol.* 8:e1000412  
doi:10.1371/journal.pbio.1000412
